# Supplementary material for: Integrated Transcriptomics and Metabolomics Analysis Reveal the Regulatory Mechanisms Underlying Sodium Butyrate-Induced Carotenoid Biosynthesis in Rhodotorula glutinis
Source: MDPI journal article supplement (doi:10.3390/jof10050320), 2024-04-27
Supplement: s1 [file s1]

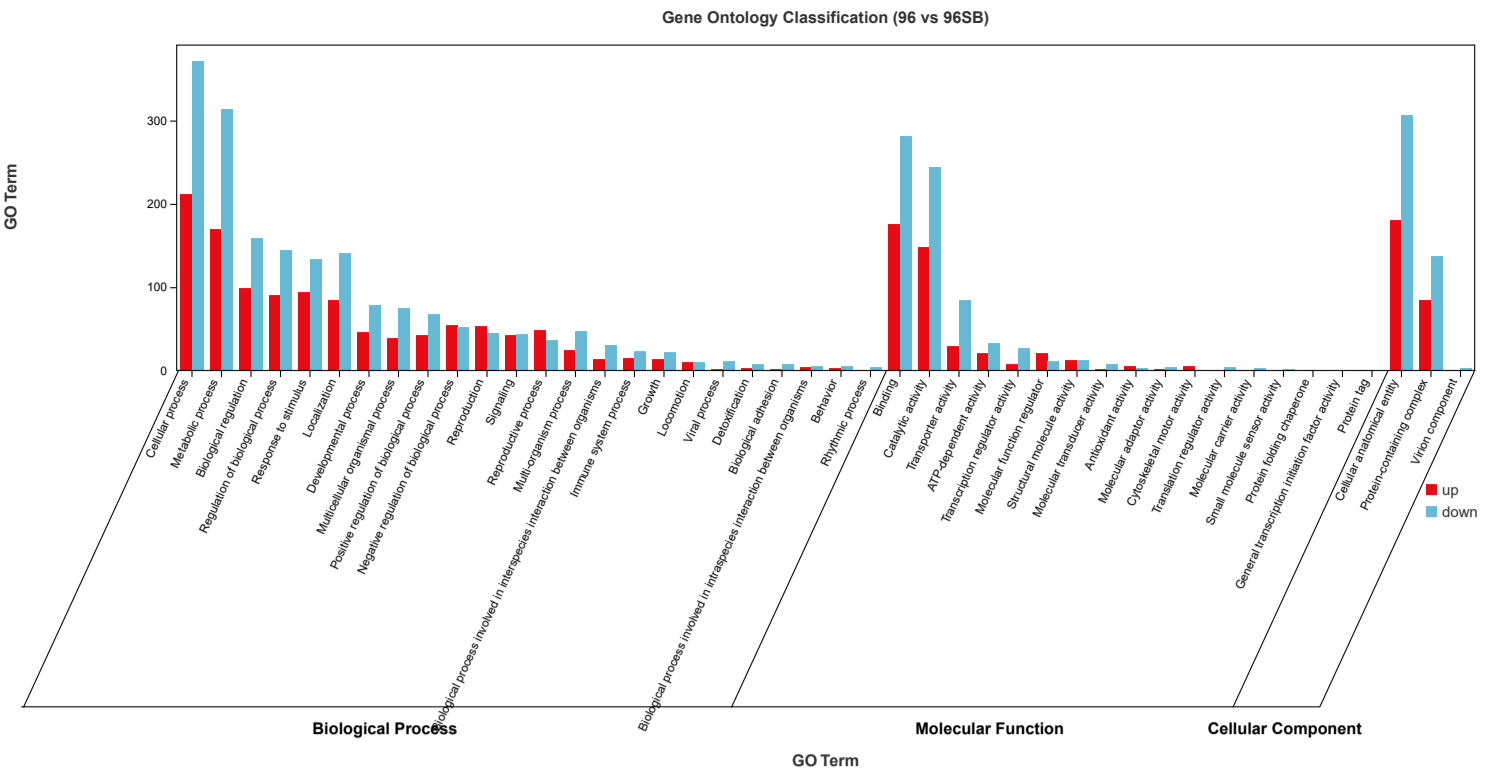

Figure S1. Functional annotation of DEGs based on gene ontology categorization.

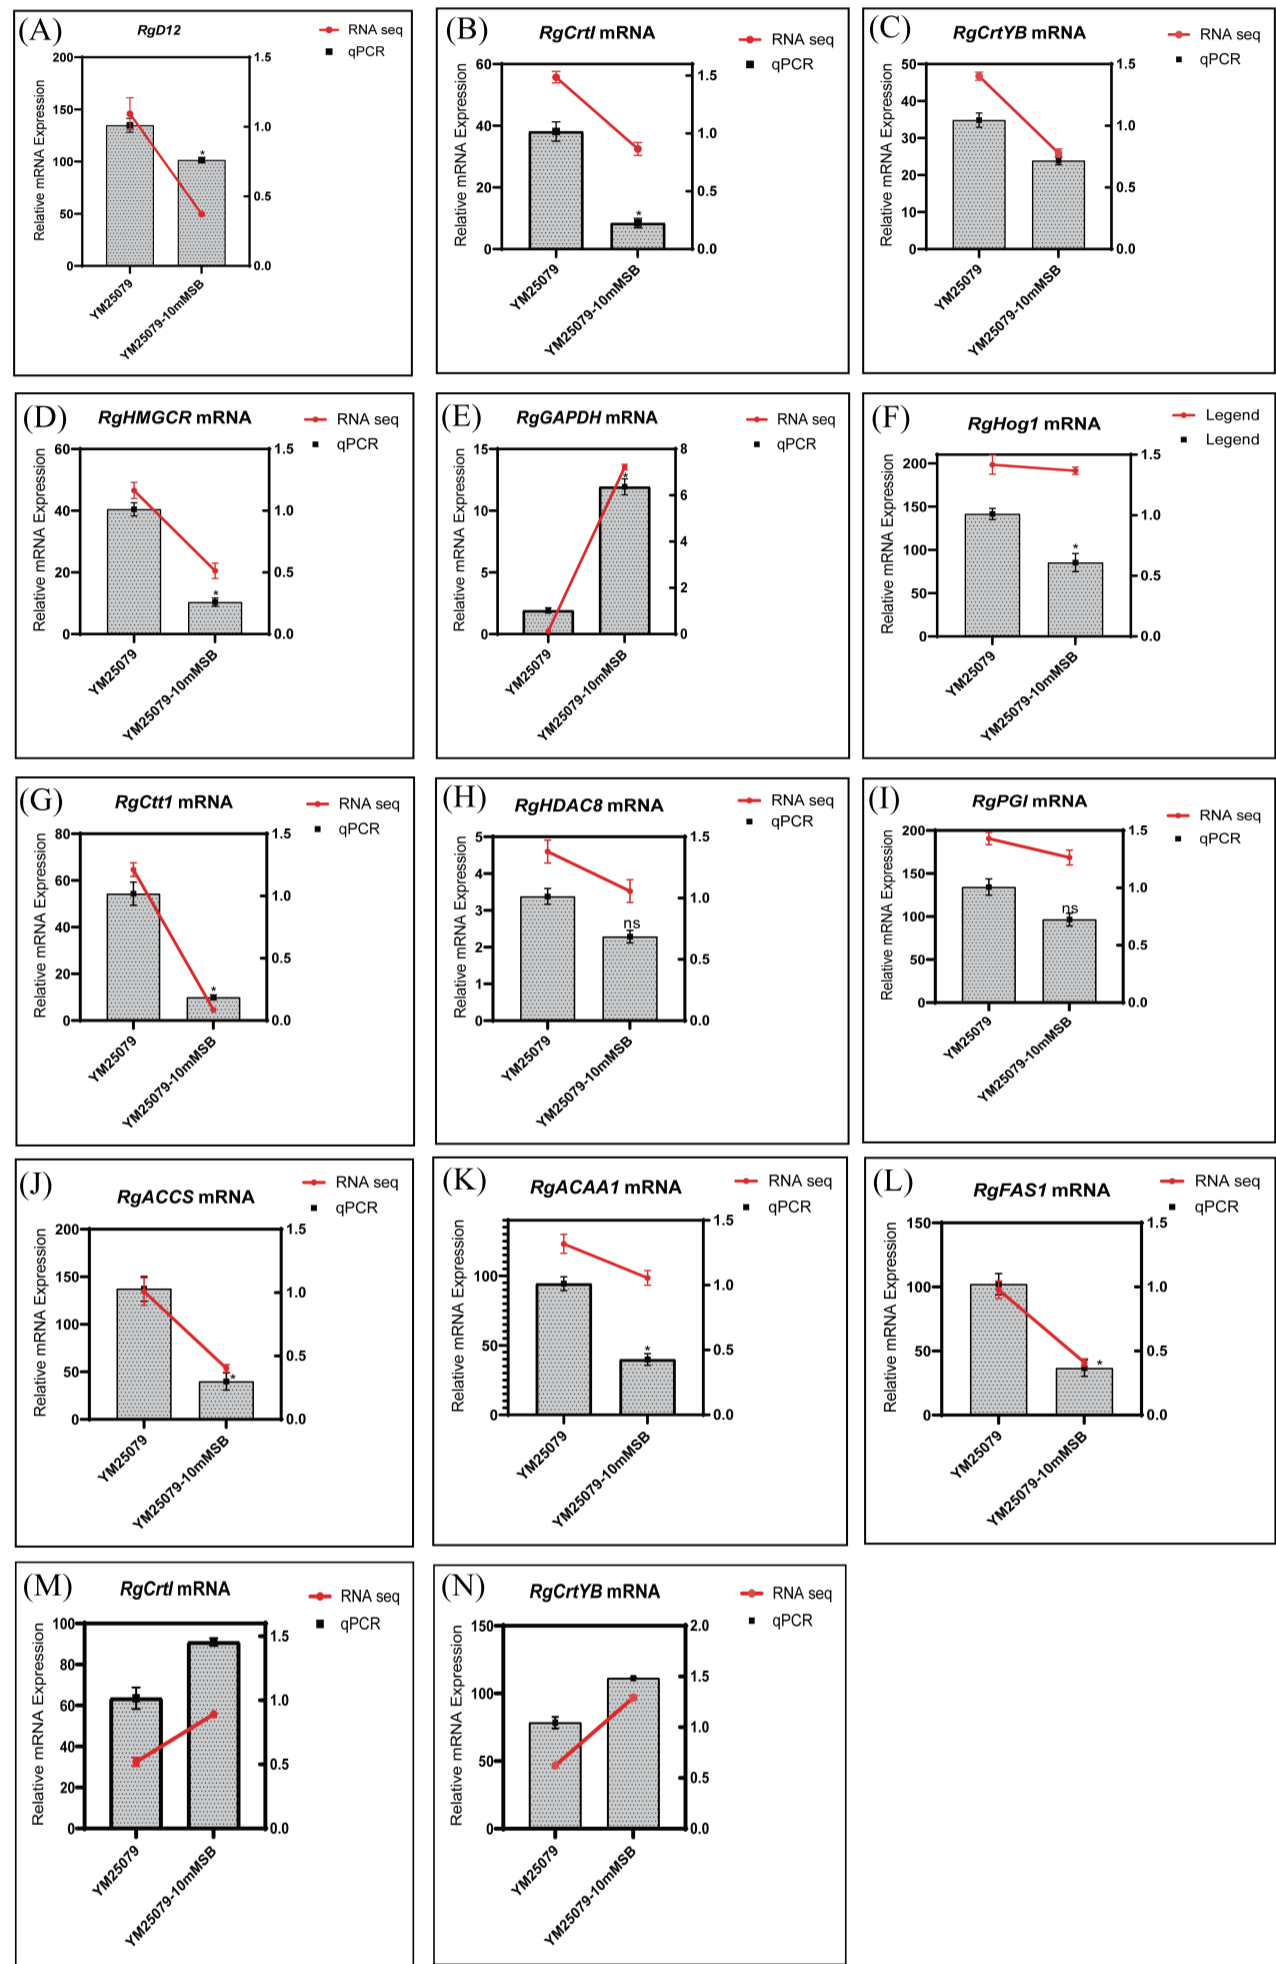

Figure S2. RT-PCR verification of differentially expressed genes after addition of 10mM NaBu.

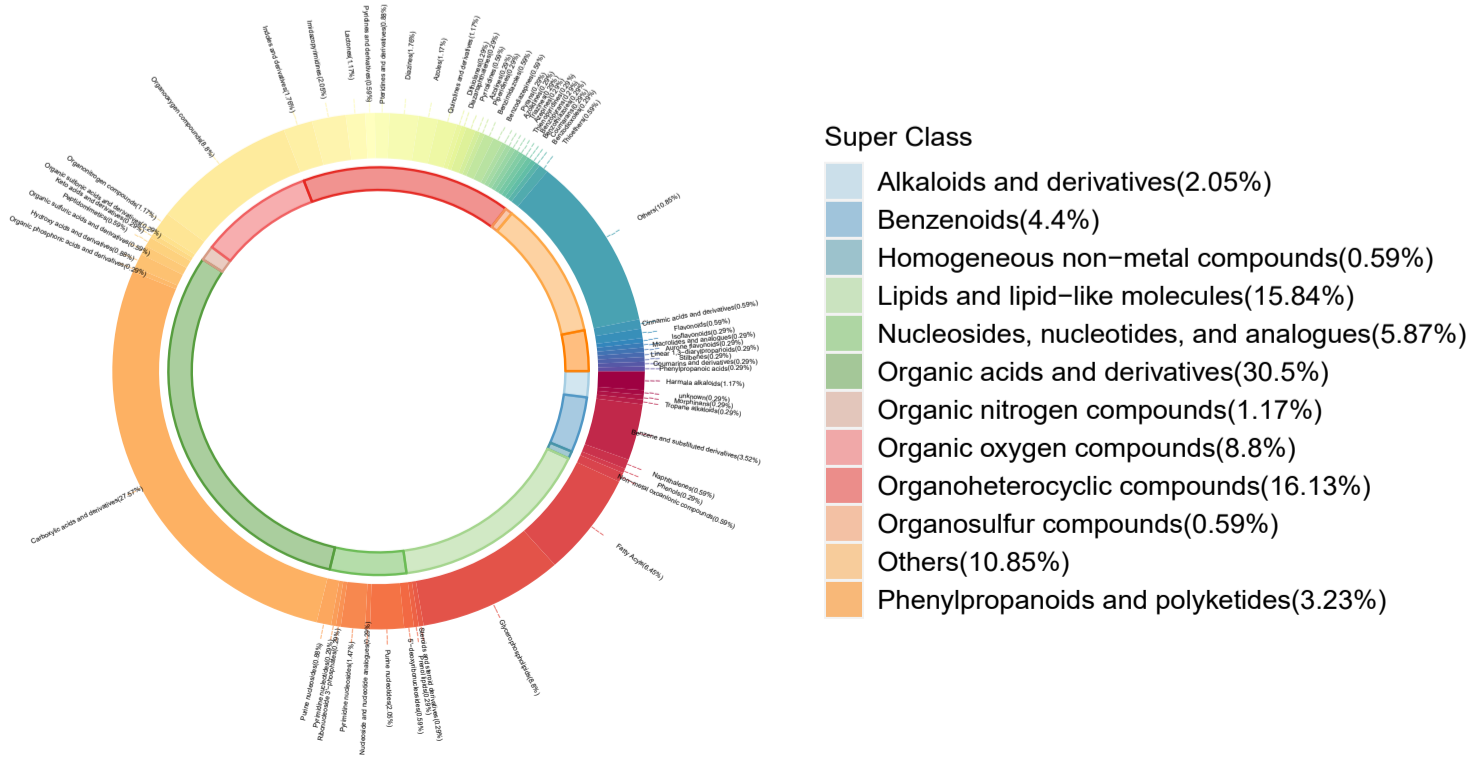

Figure S3. Classification of metabolites detected in total ion chromatography (TIC)
